# Supplementary material for: New insights on the modeling of the molecular mechanisms underlying neural maps alignment in the midbrain
Source: eLife. 2020 Sep 30;9:e59754. doi: 10.7554/eLife.59754 (PMC7527235; doi:10.7554/eLife.59754)
Supplement: Figure 1—source data 1. — Data for Figure 1B: Expression levels, relative to wild-type, of collicular and cortical V1 Ephas and Efnas in Isl2Epha3/Epha3 animals. [file elife-59754-fig1-data1.xlsx]

## Sheet: Source data fig 1A
	Efna2						Efna3						Efna5						EphA3
	WT			EphA3KIKI			WT			EphA3KIKI			WT			EphA3KIKI			EphA3KIKI
	N	C	T	N	C	T	N	C	T	N	C	T	N	C	T	N	C	T	N	C	T
Fold WT N	1	0.77	0.88	1.06548	1.08673	0.619255	1	1.04713	0.857594	0.817391	1.03478	0.805729	1	0.826429	0.639476	1.06804	0.836846	0.714478	1	1.13	1.35
		0.986233	0.978112	1.09934	1.0133	0.889029		0.910079	0.83222	0.764123	0.803872	0.870551		0.635092	0.542642	0.969315	0.822491	0.444421		1.31	1.09
		1.12506	0.879626	1.0856	1.03714	0.929829		1.05815	1.1212	0.989682	0.877271	0.795875		0.849663	0.445953	1.19588	0.690177	0.514057		0.89	0.81
		1.02	0.66	0.975064	0.850791	0.917028		1.25322	1.13733	0.963025	1.10891	1.0396		0.545268	0.353553	0.949367	0.873596	0.421919		0.97	0.95
		0.81	0.64	0.860745	0.566832	0.503851		1.20802	1.21975	1.29012	1.4895	1.45432		0.776449	0.537733	1.04606	0.946058	0.617693		1.05	1.01
		0.74	0.56	1.08611	0.911702	0.809463		0.972655	0.771085	0.624978	0.674134	0.807556		0.702222	0.460094	0.812252	0.755256	0.562529		1.12	1.17

## Sheet: Source data fig 1B
	V1					SC
	Efna2	Efna3	Efna5	EphA4	EphA7	Efna2	Efna3	Efna5	EphA4	EphA7
Fold WT	1.22688	2.20381	1.34723	0.852635	1.59107	1.04972	0.879649	0.846745	0.982821	0.976032
	1.00347	0.721965	0.671286	1.30134	1.01045	0.882703	0.737135	0.787308	1.03526	0.626332
	1.31039	0.876606	1.25266	0.949342	1	1.28788	1.23971	1.09429	1.35191	1.13288
	1.68179	0.776469	1.04608	1.06807	0.714497	2.05623	1.03526	0.993092	1.16878	1.04608
	0.820742	0.815072	0.732043	1.02811	1.12896	1.06807	1.56917	1.11729	1.72907	1.64148
	0.787308	0.835088	0.76313	1.15269	0.99654	0.923382	1.15669	0.858565	1.29684	1.10957
	1.19334	1.27456	1.3566	1.54221	2.24233
	1.13288	1.14472	1.12896	1.84676	1.37554
