# Supplementary material for: New insights on the modeling of the molecular mechanisms underlying neural maps alignment in the midbrain
Source: eLife. 2020 Sep 30;9:e59754. doi: 10.7554/eLife.59754 (PMC7527235; doi:10.7554/eLife.59754)
Supplement: Figure 3—source data 1. — Data for Figure 3D: Cartesian values of experimentally measured collicular termination zones and corresponding cortical V1 injections in Isl2Epha3/+ animals. Data for Figure 3F: Cartesian values of experimentally measured collicular termination zones and corresponding retinal injections in Isl2Epha3/Epha3 animals. Data for Figure 3B: Cartesian values of experimentally measured collicular termination zones and corresponding cortical V1 injections in Isl2Epha3/Epha3 animals. [file elife-59754-fig3-data1.xlsx]

## Sheet: Fig. 3B
RC EphA3KI/+
% Ret. N-T axis	% SC R-C axis		ID #
22	51	90	A3.94.1
91	4		A3.111.4

## Sheet: Fig. 3F
RC Epha3KIKI
% Ret. N-T axis	% SC R-C axis		ID #
26	42	91	A3.91.5
57	22	74	A3.120.14

## Sheet: Fig. 3D
CC Epha3KI+
% V1 L-M axis	% SC R-C axis		ID #
13	73	91	A3.10.1R
21	71	93	A3.13.1L
26	56	83	A3.10.2L
29	46	72.1607	A3.10.5L
29	44.3559	76.494	A3.10.6L
31	39	73	A3.10.7R
34	43	68	A3.13.4L
34	40	67	A3.13.5R
34	43.0809	84.7258	A3.10.8L
35	44.8513	82.7231	A3.10.7L
36	39.3939	70.9596	A3.10.6R
49.5413	39.6396	58.2583	A3.10.1L
54	31.5051	54.8469	A3.10.8R
72	26		A3.10.2R
82	12		A3.83.3R

## Sheet: Fig. 3H
CC Epha3KIKI
% V1 L-M axis	% SC R-C axis		ID #
22	45	85	A3.21.3R
32	33	82	A3.21.6R
43	27	67	A3.21.2R
46	40	58	A3.14.5L
48	29	62	A321.2L
65	30	57	A3.14.1R
78	20	42	A3.10.3R
