# Supplementary material for: New insights on the modeling of the molecular mechanisms underlying neural maps alignment in the midbrain
Source: eLife. 2020 Sep 30;9:e59754. doi: 10.7554/eLife.59754 (PMC7527235; doi:10.7554/eLife.59754)
Supplement: Figure 5—source data 1. [file elife-59754-fig5-data1.xlsx]

## Sheet: Fig. 5
WT		Epha3KI/+		Epha3KI/KI		Efna3KI/+		Efna3KI/KI
RC	CC	RC	CC	RC	CC	RC	CC	RC	CC
1.83787	4.54606	9.81835	11.9052	27.5552	41.2585	1.0328	5.3375	1.64655	7.67391
1.68655	4.22164	9.3832	7.89937	28.0666	40.7818	2.06559	6.28579	2.319	8.69483
3.45768	8.83428	10.6999	13.0724	35.4658	36.8661	3.09839	10.1544	3.53396	7.61285
3.80058	6.93141	12.2583	13.4594	35.6707	34.9126	3.4254	7.80028	2.67499	8.89694
2.74064	8.0111	14.5892	18.2586	42.259	45.8713	2.67499	8.75341	3.3731	11.2428
3.27278	7.25412	14.5082	21.7143	41.6248	37.5446	2.34758	9.80929	2.98887	9.41866
4.63801	4.82586	14.5998	16.514	51.2601	46.4088	2.20101	15.5621	3.32666	7.43565
2.95146	7.71722	15.9011	15.2956	48.5254	44.1613	2.16025	13.1335	2.85968	11.9926
4.00555	8.74579	17.6081	17.574	52.5446	50.6298	3.65756	15.7198	2.53859	11.7379
2.83627	5.18116	18.7427	24.9096	52.1796	44.9078	3.12694	15.4359	3.58391	10.9626
3.27278	9.97998	19.2712	17.0867	53.3837	47.5553	3.65756	12.8996	3.53396	12.0074
3.8239	7.87683	18.427	17.2059	51.8905	51.7021	4.11501	16.6867	3.65756	13.7421
2.85968	9.57079	20.887	22.3269	52.9742	51.8648	6.71979	16.5784	3.50238	18.0074
4.73286	7.31817	21.8113	22.8425	54.0781	44.109	4.56557	14.7105	3.77712	8.04432
3.50238	8.06639	24.2432	25.9238	53.2065	55.3309	3.26599	12.1546	2.79682	26.9493
3.50238	12.5857	26.0333	24.097	52.9574	52.2817	5.18116	11.3529	4.75628	33.0716
5.98145	9.81835	25.9743	22.6431	50.0084	52.4938	2.63312	16.8865	4.04969	28.1464
3.70585	5.79655	24.8381	30.7072	52.3391	52.6646	4.6428	17.4407	2.319	29.937
5.71936	7.54542	27.9722	32.1448	54.4369	49.4395	4.26354	16.2262	3.19026	30.0821
3.23866	6.7363	26.1117	32.9417	51.6781	52.5632	2.34758	17.1127	3.80058	30.1588
3.89301	6.93141	29.3485	32.8065	52.7704	53.2871	6.14275	17.3909	2.70801	29.2909
2.79682	8.65384	29.5327	33.983	52.5361	54.1475	4.40202	18.5185	4.50185	33.9077
4.93964	6.71979	34.9705	37.2195	53.0698	52.3747	2.85968	13.8066	2.69979	32.4284
4.84883	8.9963	33.0226	31.3269	52.548	55.3651	4.6188	15.2607	4.71876	27.9277
4.2374	6.21468	34.4764	33.7968	54.4957	54.0798	4.8808	15.6404	4.44222	28.2913
3.79473	12.2565	36.1257	34.8591	54.5918	51.8219	4.34613	18.3121	4.40202	23.5938
3.65756	8.27312	38.5262	44.3767	52.5002	48.8631	3.55278	14.5694	3.55278	32.0312
4.73286	7.54542	38.7728	43.8361	51.9658	48.8358	3.27278	15.6759	4.34613	22.8074
2.98142	8.50882	43.1844	43.38	51.2861	52.053	6.32456	19.401	2.83627	26.7033
4.91709	9.39267	39.2762	37.9825	54.014	54.4288	4.15799	13.882	4.19524	27.9722
4.97103	9.96884	44.6622	42.0243	52.2966	51.5023	2.89828	16.5045	3.70585	29.44
5.05964	6.16802	45.6465	49.8286	51.7777	47.3516	3.12694	11.0835	3.12694	24.4958
4.99333	5.42013	48.1207	47.2892	53.2099	51.1212	3.8873	15.5048	3.77124	25.0342
5.66078	8.9542	48.5473	42.2711	51.2983	56.113	6.7363	11.9276	3.16228	24.4486
6.6966	9.63558	47.9449	44.3626	53.8727	54.7516	5.23238	11.6543	6.19677	25.4069
8.2084	9.89725	49.0877	43.5048	53.8397	50.8807	5.0111	16.3313	5.33333	24.762
5.16828	6.87992	45.8156	45.7238	52.5446	44.4567	3.9101	10.9158	4.19524	21.7879
6.23966	11.5085	45.3745	46.1476	51.4592	54.4226	5.27046	10.2502	2.67499	27.3902
3.27278	6.47731	46.9042	48.334	53.0848	55.1946	3.86437	12.1399	3.13404	29.1021
5.00666	6.91536	44.594	46.9117	54.965	52.6629	6.38053	11.6314	5.83095	19.3781
4.63801	6.733	46.3249	48.0629	52.6325	54.1931	4.10961	12.7819	4.75628	20.0044
5.31664	9.09456	47.7773	44.584	54.4957	47.488	4.73756	20.4189	5.3707	21.7297
7.91342	7.31513	48.2106	40.343	53.9732	55.1104	3.3731	11.2428	4.63801	18.8432
2.95146	5.73876	43.5477	47.0654	51.1312	52.2919	8.06639	13.6039	5.51362	24.2432
6.74949	14.4284	42.2248	44.4702	51.1016	53.2232	5.94792	10.8238	6.53197	23.2666
6.1101	6.39792	43.6226	44.4622	52.9826	52.5446	6.80196	13.9459	7.16783	27.1629
5.3707	9.37135	44.769	41.3382	52.1745	52.5107	4.44722	8.35065	4.36654	24.5321
6.47731	5.51765	44.2242	47.6357	53.427	52.5885	6.7363	13.5138	5.25357	20.8529
5.20256	5.39959	45.2234	46.2092	53.7984	48.037	4.44722	12.5007	6.74619	20.9221
5.66078	4.73756	42.2984	41.1615	51.721	50.8283	5.53373	11.3608	9.28559	24.1514
3.77124	8.9169	44.2563	44.2839	53.3517	51.7962	5.58172	12.6772	5.96657	20.6817
9.47746	5.81187	46.8193	44.8484	50.9396	50.5617	7.06792	13.1403	6.97933	24.571
5.48128	6.94422	43.1025	38.7493	51.7927	41.2951	8.24352	9.52424	6.28579	20.8657
5.59365	4.59952	44.0283	38.6488	52.1621	48.3983	6.38053	12.5149	6.23966	19.2631
6.97933	9.80703	42.4767	41.4922	52.9335	52.0239	4.93964	12.6649	5.61348	25.2138
8.44591	9.46573	43.7594	40.257	52.6916	51.7927	6.93141	6.85079	6.47731	16.8865
6.33859	7.42668	40.0361	39.1896	53.125	51.8631	5.98145	13.858	3.77712	19.031
3.9101	4.90351	41.6205	44.6363	53.7653	50.7823	5.07718	15.2738	5.94792	20.0322
5.11642	7.68548	42.7546	42.5629	53.4619	51.8155	3.80058	13.0656	7.48331	23.1142
5.73876	6.74619	43.9399	41.8404	50.8086	53.5101	3.97772	14.3666	6.40833	20.2265
6.25744	8.02496	43.0421	44.1835	51.416	51.8356	7.18331	13.1335	5.39959	13.4148
8.49837	5.97774	40.8145	42.6792	52.351	52.6814	10.4478	10.174	5.6921	20.1726
7.29079	10.4669	40.9818	40.1713	50.896	46.4739	6.0553	9.40213	3.01846	15.817
7.47143	5.27046	39.9244	33.0951	48.9085	50.7583	7.80028	13.5319	8.75595	17.72
7.16783	10.3623	38.1512	35.3748	49.2833	47.539	8.63069	12.2945	8.32933	15.4977
4.90351	4.81202	40.392	40.3259	52.4748	51.7069	10.0775	10.198	7.37564	17.9691
6.53537	8.99383	44.6239	41.2607	51.7704	50.3922	9.83418	9.53124	8.27312	17.5119
7.24492	9.27601	41.4241	38.3342	54.5772	49.6749	7.61285	14.577	8.94676	19.3781
8.17585	14.2361	37.5594	41.042	50.2266	49.7018	5.20256	12.8927	7.96939	20.4928
10.4051	8	41.217	31.8022	50.9993	49.4251	10.2502	13.7534	8.52708	14.6682
9.24962	10.9949	39.7263	41.1118	50.3128	50.4116	3.70585	10.3193	9.24722	17.2768
5.71936	8.75341	42.6646	39.7526	51.3134	47.6753	6.21468	5.71936	7.06792	19.2481
5.14674	6.14275	40.6612	37.7807	50.5103	52.7619	8.44327	10.7269	10.261	12.693
5.73876	12.6509	40.7054	40.2437	46.8705	41.7272	10.0775	9.81835	7.10555	17.2253
8.74579	8.65384	38.6207	39.3706	50.3768	45.0067	8.79394	15.4977	5.59762	20.134
9.62404	11.1634	38.3371	37.7712	52.1042	52.0752	8.16769	8.26236	8.79646	20.8017
9.43987	12.1929	42.2001	43.1823	50.7933	52.2541	5.07718	8.2758	5.79655	18.3606
10.6667	7.7201	40.403	29.8626	49.9907	49.3405	8.2084	14.2111	9.65171	18.969
8.26236	8.79646	32.8234	32.379	49.506	53.8409	8.5479	7.14609	8.2084	18.4089
9.63558	12.4025	37.1998	40.9449	51.5472	43.1766	7.25718	15.2549	7.77746	15.5849
9.66322	6.38053	41.1307	35.7423	51.5864	49.6839	4.90351	13.7534	4.44722	20.8795
8.80404	9.37135	37.4172	42.0291	52.351	49.5585	7.67101	8.33733	8.85689	13.9984
7.19259	8.50882	38.7034	37.9596	52.0956	50.509	8.09938	11.0935	7.8429	12.474
8.38252	7.19259	33.6419	31.8894	50.618	37.502	9.05293	7.12117	5.75036	17.5132
9.57775	10.924	37.2857	33.6227	48.1336	46.9349	12.9289	10.8095	9.54289	10.9727
7.96939	8.16497	38.5999	32.8065	49.9618	49.4036	8.80404	14.1814	8.28385	14.7332
8.06639	13.3016	38.7562	37.677	51.5023	47.1447	10.2437	14.2688	8.44327	11.5489
12.2583	12.8253	34.7313	35.3748	47.8465	51.2861	10.7827	9.89725	11.935	17.0503
11.1575	7.0206	37.1639	41.876	49.7889	45.06	7.66232	10.261	11.005	14.2423
14.6727	10.2328	38.2977	36.4417	50.5455	51.7103	9.66322	14.9726	5.59762	14.0238
7.89937	14.5755	35.4627	21.747	48.8098	48.4337	10.7269	9.35474	8.56089	10.9626
5.64112	9.3238	41.9651	37.3429	47.7475	38.2744	8.5479	11.2527	11.1972	16.1782
5.27046	8.48528	39.719	39.2734	49.1094	50.8226	10.3709	7.78888	9.0037	14.0933
7.89092	5.67255	36.5002	26.2941	49.6369	46.5312	8.42219	10.8341	10.0664	11.8152
11.4329	9.2111	35.1309	36.0401	48.2259	45.5407	8.49575	11.9703	6.60303	9.25923
6.48074	11.392	35.9265	31.241	49.2815	42.8377	10.3043	8.88444	9.87927	8.86692
13.3683	4.04969	37.3071	35.9759	49.1117	48.6731	7.47143	9.80023	7.00476	7.94705
6.9282	9.24001	38.2907	36.3691	49.2111	38.3209	10.583	9.01604	4.97103	9.40213
7.89937	3.19026	34.5672	31.7357	47.8591	47.1145	2.66667	9.2376	6.0553	8.22192
4.13118	8.32666	34.5672	37.1454	50.9156	45.2666	6.67999	4.21637	5.18545	5.09466
